# Supplementary material
Source: PubMed Central journal article supplement (PMC5826900)
Supplement: NIHMS942382-supplement-Fig_S1.pdf [file NIHMS942382-supplement-Fig_S1.pdf]

## Supplementary Figure 1

### A. $\beta$ -arrestin1 translocation to the AT1R

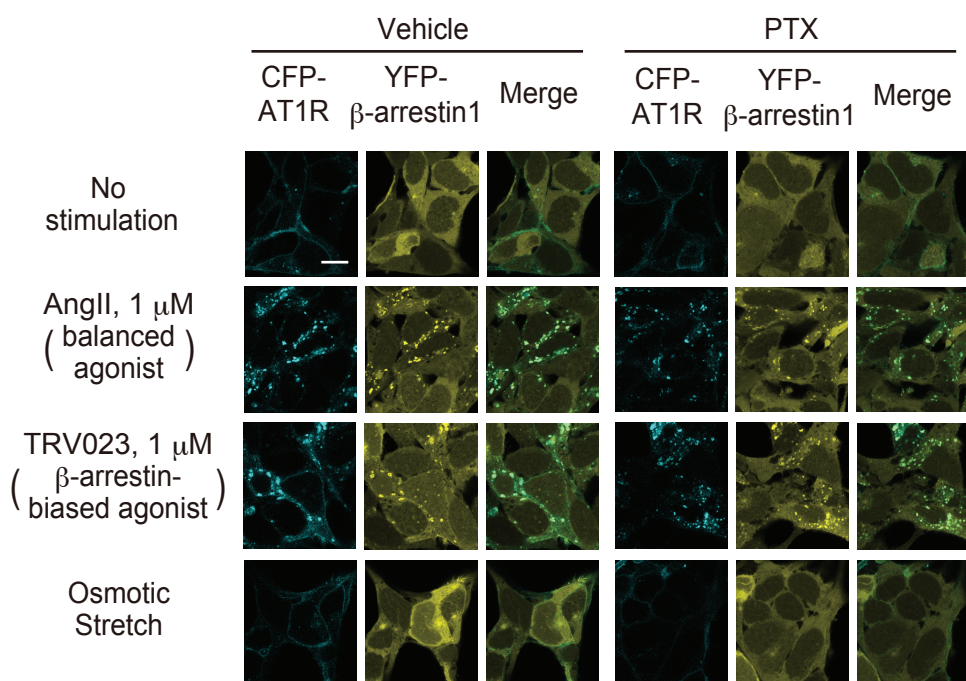

### B.

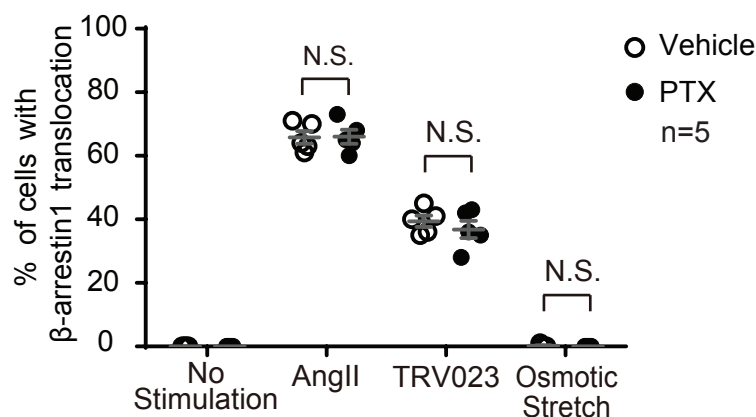

TRV023: TRV120023

### Supplementary Figure 1. Osmotic stretch did not induce $\beta$ -arrestin1 recruitment to AT1R.

HEK293 cells stably expressing CFP-tagged AT1R and YFP-tagged  $\beta$ -arrestin1 were transiently transfected with GRK5. Cells were pretreated with vehicle or 200 ng/ml PTX for overnight, then stimulated with 1  $\mu$ M AngII, 1  $\mu$ M TRV120023 or osmotic stretch for 10 min. A, stimulation with AngII and TRV120023 induced  $\beta$ -arrestin1 recruitment to AT1Rs, which were not affected by PTX.

In contrast, the  $\beta$ -arrestin1 translocation was not observed in cells treated with osmotic stretch. Scale bar = 10  $\mu$ M. B, quantification of  $\beta$ -arrestin1 translocation was expressed as the percentage of cells showing intracellular aggregates of  $\beta$ -arrestin1. Data represent the mean  $\pm$  SEM for n independent experiments as marked on the figure. Statistical significance was assessed using two-way ANOVA with Bonferroni correction.
